# Supplementary material for: Widespread occurrence of non-canonical transcription termination by human RNA polymerase III
Source: PubMed Central journal article supplement — Nucleic Acids Res. 2011 Mar 17;39(13):5499–512. doi: 10.1093/nar/gkr074 (PMC3141230; doi:10.1093/nar/gkr074), 2011-03-17
Supplement: supp_gkr074_Orioli_revised_Supplementary.pdf [file supp_gkr074_Orioli_revised_Supplementary.pdf]

## **ORIOLI *et al* – SUPPLEMENTARY DATA**

### **SUPPLEMENTARY MATERIALS AND METHODS**

#### Analysis of viral transcription units

The mouse fibroblast cell line 3T3 (ATCC CRL-1658) was cultured in complete DMEM (Gibco) supplemented with 5% FBS (Hyclone), 2 mM L-glutamine, 10 U/ml penicillin, and 10 µg/ml streptomycin sulfate.  $\gamma$ HV68 strain WUMS (ATCC VR-1465) was used for all infections. Virus stocks used for infection were passaged, grown, and titer determined as previously described (Virgin *et al.*, 1997). Infections were carried out at a multiplicity of infection (MOI) of 5 plaque forming units (PFU) per cell. Total RNA was extracted from 3T3 cells 36 hours after infection using the *mirVana*<sup>TM</sup> miRNA isolation kit (Applied Biosystems). 5' triphosphate-containing RNA molecules were enriched from the total RNA pool as follows: 3µg of total RNA was incubated with 25U of Antarctic Phosphatase (New England Biolabs) and 40U of Rnasin (Promega) at 37°C for 1 hour. The phosphatase reaction was stopped by heat-inactivation at 70°C for 10 minutes. After ethanol/sodium acetate precipitation, purified RNA was resuspended in 100 µl of RNase-free water. Phosphatased RNA (1µg) was incubated with 40 U of RNasin and 10 U of T4 Polynucleotide Kinase (New England Biolabs) and T4 DNA Ligase Buffer with 10mM ATP (New England Biolabs) at 37°C for 30 min. After heat inactivation of the kinase reaction, RNA was precipitated as described. The entire amount of kinased RNA recovered (~1µg) was used as template in the inverse RT-PCR reaction. To circularize the triphosphate enriched RNA molecules, 1 µg of modified RNA was incubated with 40U of RNasin, 10U of T4 RNA ligase (New England Biolabs) and T4 RNA ligase reaction buffer, in a 50-µl total volume at 37°C for 1 hour. The ligase reaction was heat inactivated at 70°C for 20 minutes. Primer sets specific to the  $\gamma$ HV68 pol III transcripts (listed in **Table S2**) were used for inverse RT-PCR amplification of the circularized RNA molecules. RT-PCR amplification reactions were performed in a 25-µl reaction mix using the OneStep RT-PCR Kit (Qiagen) containing each primer at 0.5µM. Circularized RNA (10 µl, ~200 ng) was treated with RQ1 RNase-Free DNase (Promega) prior to addition to the RT-PCR reaction mix. RT-PCR reactions were performed as follows: 30 min at 50°C; 15 min at 95°C; 40 amplification cycles of 30 sec at 94°C followed by 30 sec of 48-56°C (dependent on the T<sub>m</sub> of the primer set) followed by 1 min at 72°C and a single final incubation for 10 min at 72°C. Once complete, 18 µl of the 25-µl RT-PCR reaction mixture were resolved on a 3% TAE agarose gel. Products were gel-purified and cloned into the pCR4-TOPO vector using the TOPO-TA Cloning Kit for Sequencing (Invitrogen). Individual colonies were then grown for plasmid DNA recovery and sequencing.

**Table S1.** tRNA genes and pseudogenes with unusually distant Pol III canonical terminators employed in the *in vitro* transcriptional assays, as annotated in the HUGO Gene Nomenclature Committee database (<http://www.genenames.org/>) or in the genomic tRNA database (GtRNAdb) (<http://lowelab.ucsc.edu/GtRNAdb/Hsapi/>).

| tRNA gene (HGNC)        | tRNA gene name (GtRNAdb) | tRNA gene position <sup>a</sup> | A-box score <sup>b</sup> | B-box score <sup>b</sup> | Sequence <sup>c</sup><br>(and predicted length of canonically terminated transcript) <sup>d</sup>                                                                                                                                                                                                                                                                                       |
|-------------------------|--------------------------|---------------------------------|--------------------------|--------------------------|-----------------------------------------------------------------------------------------------------------------------------------------------------------------------------------------------------------------------------------------------------------------------------------------------------------------------------------------------------------------------------------------|
| <a href="#">TRNAR9</a>  | chr6.trna114-ArgCCG      | chr6:28710728-28710801 (-)      | -14.03                   | -3.62                    | ACCCGCGTGC <b>GGCCGCGTGGCCTAATGGATAAGGCGTCTGATTCCGGATCAGAAGATTGAGGGTTCGAGTCCCTTCGTGGTTCGT</b> GTTCCTACTATTGTCCAGGAAATATCTTACTTTCTGCACATCTCCTTGAGCTTTCTGCAAGCCA GTTAAAAAAAAAAAAAAAAACCGGCTTGTTCCCAAGACTTTGGGAAC TTGAAATGAAAGAAGACTATTGACAAAAAAAAACAAGAACCCGGTAAGCAACCTGTGTATTGACTATTA AAGTGCAC TTTGTCCCTGGCATAGGTACTACCGGAGG CATTTCGTAATTTGGAATGGGCTTGG <b>TTTTT</b> CAATTTA TG (321 nt) |
| <a href="#">TRNAV18</a> | chr6.trna115-ValAAC      | chr6:28703206-28703277 (-)      | -9.50                    | -3.21                    | CATTGTAAGT <b>GGGGGTGTAGCTCAGTGGTAGAGCGTATGCTTAACATTCATGAGGCTCTGGGTTCCGATCCCCAGCACTTCCACAAGTACATTTCCCTTATATCTATCGTTGAACATTTTCGTTTCAGTCTTTGAATACTTAGTTCCAGTCTTTT</b> C TTTTTTCTT (147 nt)                                                                                                                                                                                                |
| <a href="#">TRNAG20</a> | chr16.trna19-GlyGCC      | chr16:70823410-70823480 (+)     | -11.19                   | -2.17                    | CACATCTGGGG <b>CATTGGTGGTTCAGTGGTAGAATTCTCGCCTGCCACGCGGGAGGCCCGGGTTCGATCCCGGCCAATGCAGCAGCAGACCTTTAGTTTAAATCGTGAGAGACTGAATTTGAGATTTACACTGCCTAAAGAATTTATAAATCCACTCTGAGAAGTGAATGACTTGTTTCTAGTTGGATTTCAAATGCCTTTGATGAAAACACTTA <b>TTTT</b>CTAAATTCT</b> (216 nt)                                                                                                                            |
| <a href="#">TRNAW6</a>  | chr7.trna1-TrpCCA        | chr7:99067307-99067378 (+)      | -15.95                   | -9.90                    | AGGTTTCCAAG <b>ACCTCGTGGCGCAACGGCAGCGCGTCTGACTCCAGATCAGAAGGTTGCGTGTTCAAATCACGTCGGGGTCAAACATGTGATCATCCCTTTCTTTAGCCAA CAGGAGTTATAGCTTGCCGGTAACTCTCAACCTTGGA CACTGTA <b>TTTT</b>CTGTTCTTTA</b> (154 nt)                                                                                                                                                                                    |
| <a href="#">TRNAT18</a> | chr6.trna60-ThrAGT       | chr6:27694473-27694546 (+)      | -12.71                   | -1.92                    | ACACAGGTGAGG <b>CTTCGTGGCTTAGCTGGTTAAAGCCCTGTCTAGTAAACAGGAGATCCTGGGTTTCAATCCCAGCGAGGCC</b> CTTTATTTCTTCCCCTAAACTTAGGTA AATTCCTTGTCACTAGTTAAACCTGACTTAGATGTATACCTAATAAAGCAGCAAACCTTGAATCTCGATGTCTGAGGCAC TTTGTAGAGGAACGTGGTGTATGGGTTGGAAATATTTACGATGAATTAGCTAAATCTATGCCAGAGACCA ACCGTCTAGAACCATCTAGAATTGAGCTGCAAT <b>TTTT</b> TACGTTTAA (290 nt)                                         |
| <a href="#">TRNAH11</a> | chr1.trna106-HisGTG      | chr1:149155828-149155899 (-)    | -16.94                   | -1.92                    | CCTGTGGCTCGCC <b>ATGATCGTATAGTGGTTAGTACTCTGCGCTGTGGCCGAGCAACCTCGGTTTCAATCCGAGTCACGGCA</b> ATGTCGTTCTTCCAGGCCGTCAGCTATCCACTTTTCGCTCCCCTGCAACCAGGCGCCTCAGGGAAAGGAAAAGAGACCTCACAGCCCACTAACCTGGCGAGGAATCCAAGGGAAGCGCTGGACGTGCTCCGTCCATTTCCGAGCCTCACACAGCAAATAACCCAGTCAGCCCTGTTGGTGGCTTACACGAAGGCAATGGTGCCTCAGAACCTG <b>TTT</b> TTCCAGTCACTG (293 nt)                                        |
| <a href="#">TRNAH3</a>  | chr6.trna33-HisGTG       | chr6:27125906-27125977 (+)      | -16.94                   | -1.92                    | CTGGTGGCGT <b>GCCGTGATCGTATAGTGGTTAGTACTCTGCGTTGTGGCCGAGCAACCTCGGTTTCAATCCGAGTCACGGCAGTACCTTGATGTGCGCTCAATTTCTCAACGTACTGAGCAGTACCTTGACGTGCGCTCAA <b>TTTTT</b>CAACATACT</b> (141 nt)                                                                                                                                                                                                     |

|                         |                     |                            |        |       |                                                                                                                                                                                                                            |
|-------------------------|---------------------|----------------------------|--------|-------|----------------------------------------------------------------------------------------------------------------------------------------------------------------------------------------------------------------------------|
| <a href="#">TRNAL12</a> | chr6.trna126-LeuAAG | chr6:28446400-28446481 (-) | -15.68 | -7.35 | GGACTAGCGT <b>GGTAGCGTGGCCGAGTGGTCTAAGACG</b><br><b>CTGGATTAAGGCTCCAGTCTCTTCGGGGCGTGGGTT</b><br><b>TGAATCCCACCGCTGCCAGGTTTATTGCAAAATTAGT</b><br>AGGGATATCTAAAGCTCATTGAGATTTGCAAGAAAA<br>CA <u>TTTT</u> CCACTGCGAG (149 nt) |
|-------------------------|---------------------|----------------------------|--------|-------|----------------------------------------------------------------------------------------------------------------------------------------------------------------------------------------------------------------------------|

<sup>a</sup>Coordinates are the boundaries of the gene (Ensemble release 58, human assembly GRCh37).

<sup>b</sup>A-box and B-box scores were calculated with Pol3scan (Pavesi et al. 1994, Nucleic Acids Res 22: 1247; Percudani et al. 1997, J Mol Biol 268:322).

<sup>c</sup>The sequence include 10 bp upstream and 10 bp downstream of the predicted full-length pre-tRNA.

**Bold:** tRNA coding sequence. Underlined: predicted Pol III non-canonical termination signals.

Underlined/red: predicted Pol III canonical termination signals ( $T_{\geq 4}$ ).

<sup>d</sup>The lengths of canonically terminated pre-tRNAs are calculated including all the Ts of the termination signal and 5 nt of 5' leader sequence

**Table S2. Primers and Northern probes list**

| trRNA gene (HGNC) primers | Primer sequence (5' to 3')                              |
|---------------------------|---------------------------------------------------------|
| TRNAR9_for                | ATCTCTAATTACGAAGTTAAAGGT                                |
| TRNAR9_rev                | ATTCATGAAACAAGTAGGACAAGA                                |
| TRNAV18_for               | CTTGGAACCTTCGCTCCAGGTGGA                                |
| TRNAV18_rev               | GGAGTGTTAGGACCCATAGTACA                                 |
| TRNAG20_for               | AGGTCTGAAGGCAAATCAACTGGAC                               |
| TRNAG20_rev               | CTGCTTTAGCGGGCCTAGGTGCAT                                |
| TRNAW6_for                | ATTATTTCCCGAACCCCGTGGTGG                                |
| TRNAW6_rev                | AGCTAAGGTGCCGGTCCACTGC                                  |
| TRNAT18_for               | TTCAGCACCTATTCTTATTCTACAG                               |
| TRNAT18_rev               | CACAACACTCAATTTATAACCATATG                              |
| TRNAH11_for               | TATGAAAGAATAGCGCGATCCCCCT                               |
| TRNAH11_rev               | ATACAAACTTGGCGACGAGCTGGG                                |
| TRNAH3_for                | AGCAAAATATTGGGGACGGG                                    |
| TRNAH3_rev                | GCTTGGGTAGGGTTGGGAAG                                    |
| TRNAL12_for               | CAGAGTCCTCAGAGTCCCCG                                    |
| TRNAL12_rev               | TACCTTGTGCTCGCAGTGGA                                    |
| RNA target                | Northern probe sequence (5' to 3')                      |
| γHV68 miR-M1-5            | GAGACGACCCGATCTCAACTCT                                  |
| γHV68 tRNA4               | CCGCTCTACCAATTGAGCTACC                                  |
| U6 snRNA                  | CGAATTTGCGTGTTCATCCTTGC                                 |
| γHV68 pol III transcripts | Primer sets for inverse RT-PCR amplification (5' to 3') |
| γHV68 pol III-1           | sense: AGAAATGGCCGTA CTCTCC                             |
|                           | antisense: CCAGAGCTCGGACTTG                             |
| γHV68 pol III-4           | sense: GCAAACCCGAGCTCCTC                                |
|                           | antisense: CGGGACCCGGGATTGACC                           |
| γHV68 pol III-5           | sense: GGGATATCGCGCCACC                                 |
|                           | antisense: CCGGAACCGACAGGATAC                           |

**Table S3. gHV68 tRNA4-miR-M1-5-like transcriptional unit**

GCGGCCGCAACCGCGCCGATAAGCTTCCGGGGTCCCAACCCTGTAAGGCAGAACGGCTGCCAGCT  
CGGATGACGCCACACTAACGTAGCCTCCAGACCGCCAGTGTGGGTGTGTCCAAGCTCACGTCGCC  
CGGCGTGGCCCCCGCTCCCCAATGACGTA ACTGCCCTGCAGCTTCTAGTAGCTTTTCGCAGCGT  
CTCCGACCGTCGGGGTAGCTCAATTGGTAGAGCGGCAGGCTCATCCCCCTGCAGGTTCTCGGTTCAA  
TCCCGGGTCCCGACG ( \* ) CAGAGTTGAGATCGGGTCGTCTCCCCCTGGCGGAAGGAGGCAAACC  
CGAGCTCCTCCTTCTTTTTCTCGAG

(\*) indicates the termination signals as described in the text: T<sub>5</sub>, T<sub>2</sub>AT<sub>3</sub>, T<sub>3</sub>GT<sub>2</sub>, TCT<sub>3</sub>, T<sub>3</sub>CT, T<sub>2</sub>AT<sub>2</sub>, T<sub>2</sub>GT<sub>2</sub> and T<sub>3</sub>, respectively. Underlined is the UAS of the 7SL RNA gene (Hs7SL-1, Englert et al. 2004, Biochimie 86:867).

Figure S1

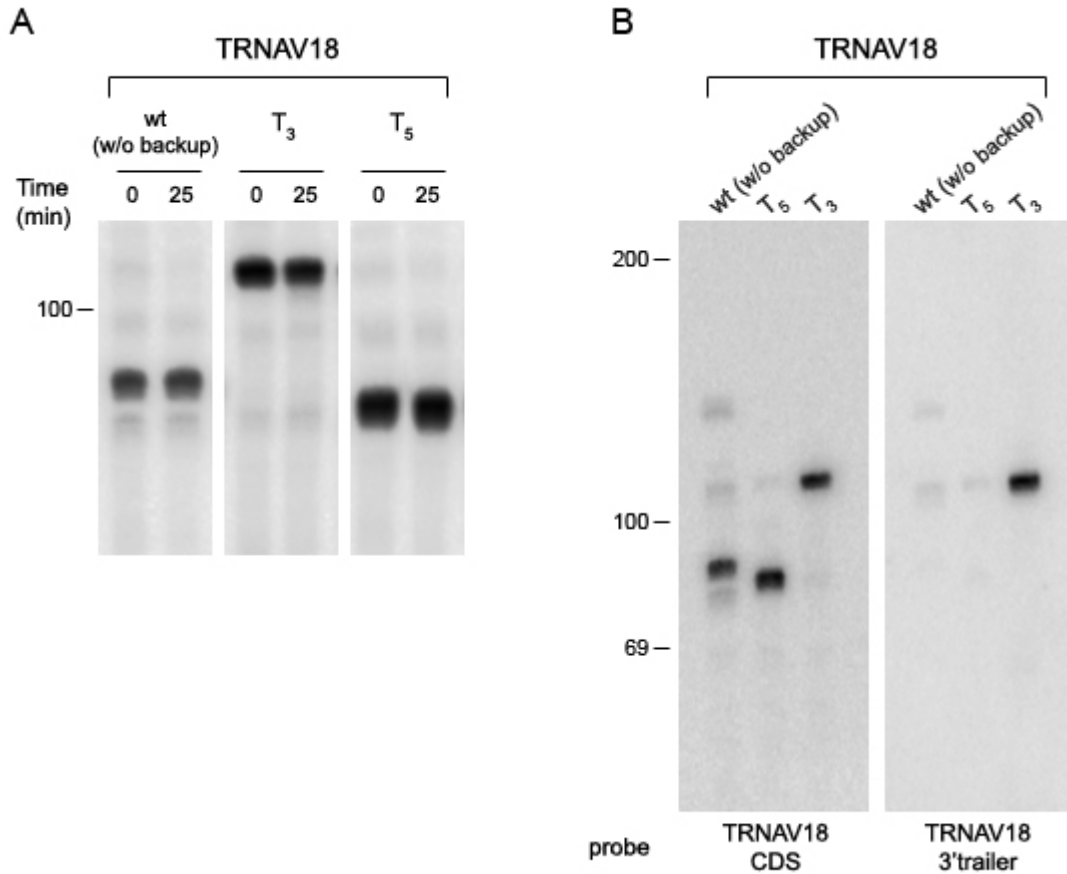

**Figure S1. Absence of pre-tRNA processing or degradation under *in vitro* transcription conditions.**

(A) Pulse-chase experiment. *In vitro* transcription of wt TRNAV18 and of its modified variants containing either a T<sub>5</sub> or a T<sub>3</sub> as the first encountered termination sequence, followed by a backup terminator (cf. Figure 3), was carried out in a HeLa nuclear extract under standard conditions, then the reaction was either stopped (time 0) or chased with 2 mM UTP for 25 minutes. Processing of all RNA species produced during the first incubation period resulted to be absent or negligible within a further 25-min time window (low levels of non-specific degradation, more marked for the transcript containing the long 3' trailer, were observed at longer chase times). (B) Northern analysis of cold transcripts produced by *in vitro* transcription under standard conditions with the wt, T<sub>3</sub>-containing and T<sub>5</sub>-containing TRNAV18 templates. No RNA species, except the ones expected as primary transcripts with the different templates, were observed.

Figure S2

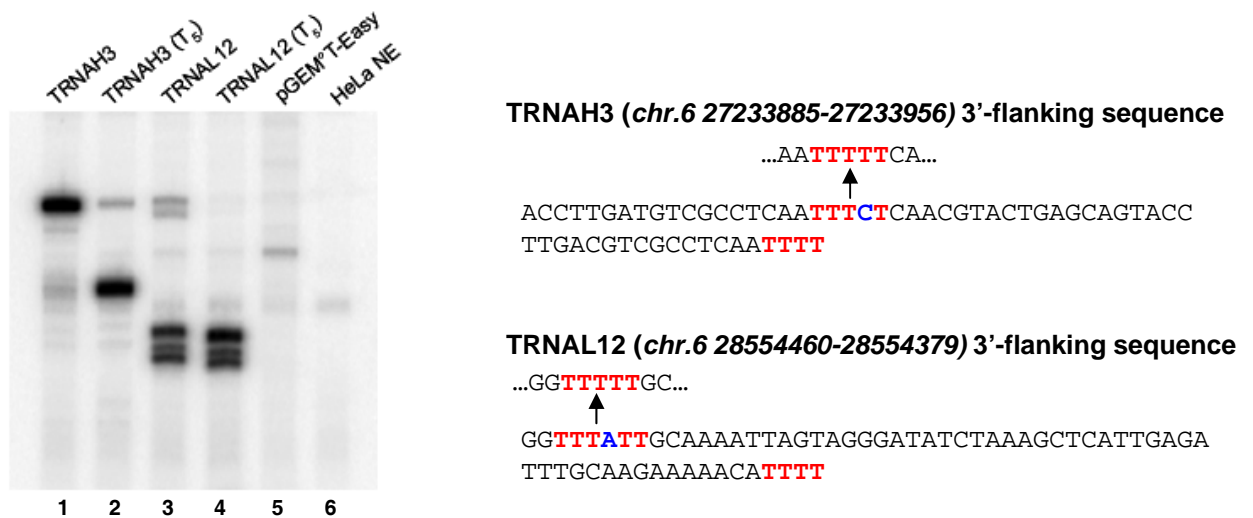

**Figure S2. Analysis of transcription termination at TRNAH3 and TRNAL12 genes.**

The TRNAH3 and TRNAL12 genes were transcribed *in vitro* using a HeLa cell nuclear extract. TRNAH3 has a T<sub>5</sub> located 58 bp downstream of the end of the coding sequence, preceded by a T<sub>3</sub>CT motif located ~35 bp upstream; TRNAL12 has a T<sub>4</sub> located 58 bp downstream of the end of the coding sequence, preceded by a T<sub>3</sub>AT<sub>2</sub> motif located ~50 bp upstream. The sequences of the 3'-flanking regions of both tDNAs are reported on the right, together with the mutations introduced to improve the non-canonical terminator.

Note the very poor termination at the T<sub>3</sub>CT motif of TRNAH3 (lane 1), to be compared with 8% termination produced by T<sub>3</sub>CT in the TRNAV18 context (Figure 3); and, in contrast, the high termination efficiency at the T<sub>3</sub>AT<sub>2</sub> motif of TRNAL12 (lane 3), to be compared with 62% termination in the TRNAV18 context (Figure 3). As expected, replacement of the two non-canonical terminators with T<sub>5</sub> restored almost complete termination at the upstream position for both tRNA genes (lanes 2 and 4). Transcript size heterogeneity observed with TRNAL12 is most likely due to multiple transcription start sites, rather than to heterogeneous termination, because it did not change when the native terminator was mutated to T<sub>5</sub>.

Figure S3

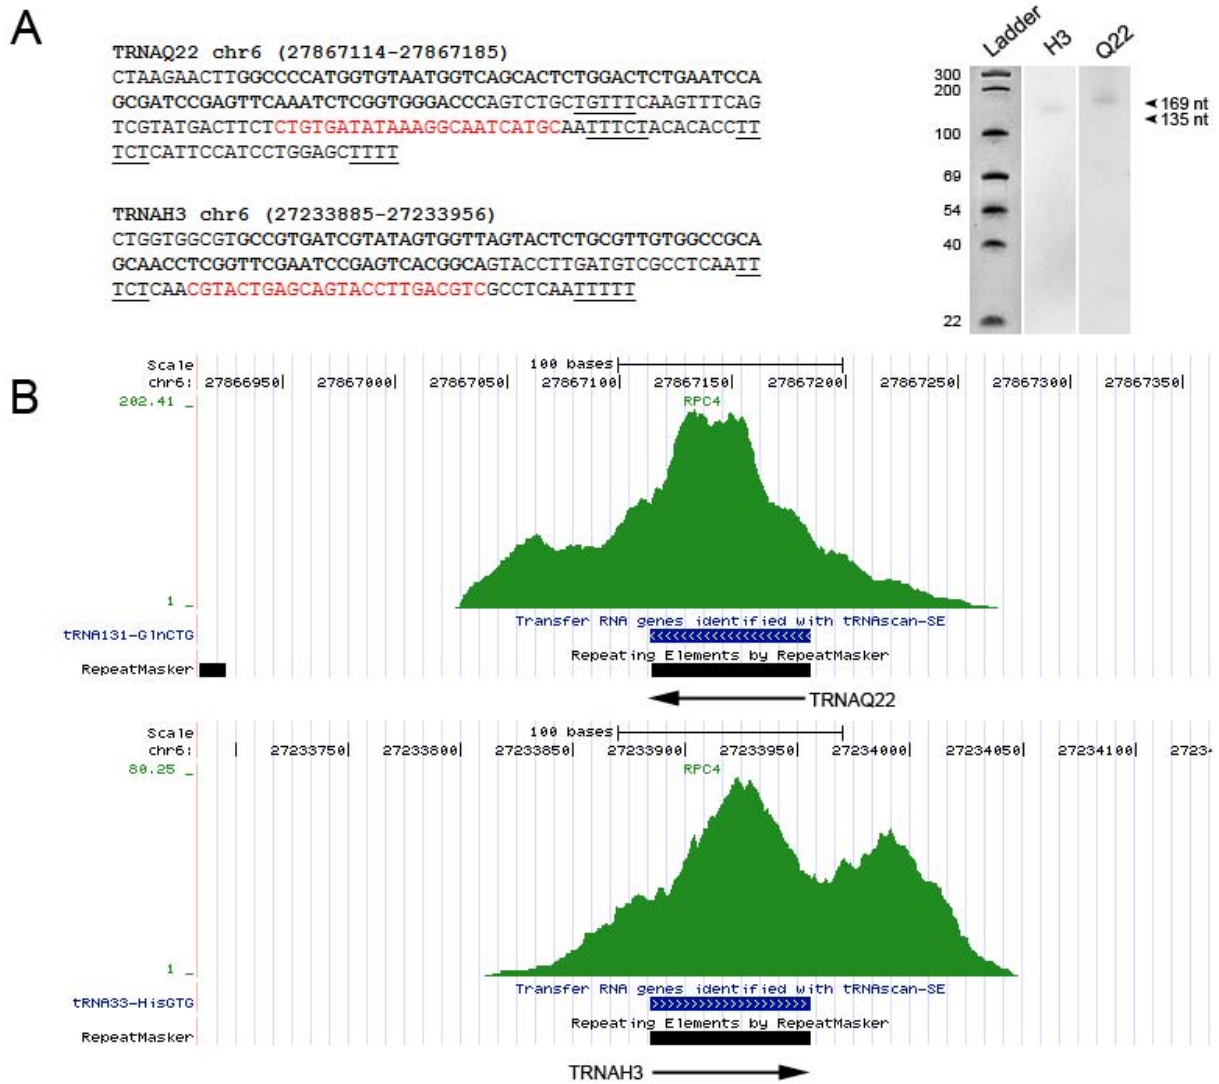

**Figure S3. *In vivo* analysis of Pol III read-through at individual tRNA gene terminators**

(A) Left: Sequence of TRNAQ22 and TRNAH3, including 10 bp of 5'-flanking sequence, the tRNA coding sequence (in bold characters) and the 3'-flanking sequence up to the closest T<sub>5</sub> termination signal. Canonical and non-canonical terminators are underlined; the sequences complementary to the oligonucleotide DNA probes are in red characters. Right: Northern blot analysis of total RNAs extracted from HeLa cells with probes complementary to the 3'-flanking sequences. The approximate lengths of hybridizing pre-tRNA transcripts are indicated on the right. (B) Trailing of RNA polymerase III downstream of two tRNA genes. UCSC genome browser view of the indicated region of chromosome 6 with the TRNAQ22 and TRNAH3 loci. The visual peak tracks were generated as described previously for POLR3D (Canella et al, 2010). The Y axis indicates cumulated tag weights. The arrows indicate the direction of tRNA gene transcription.

Figure S4

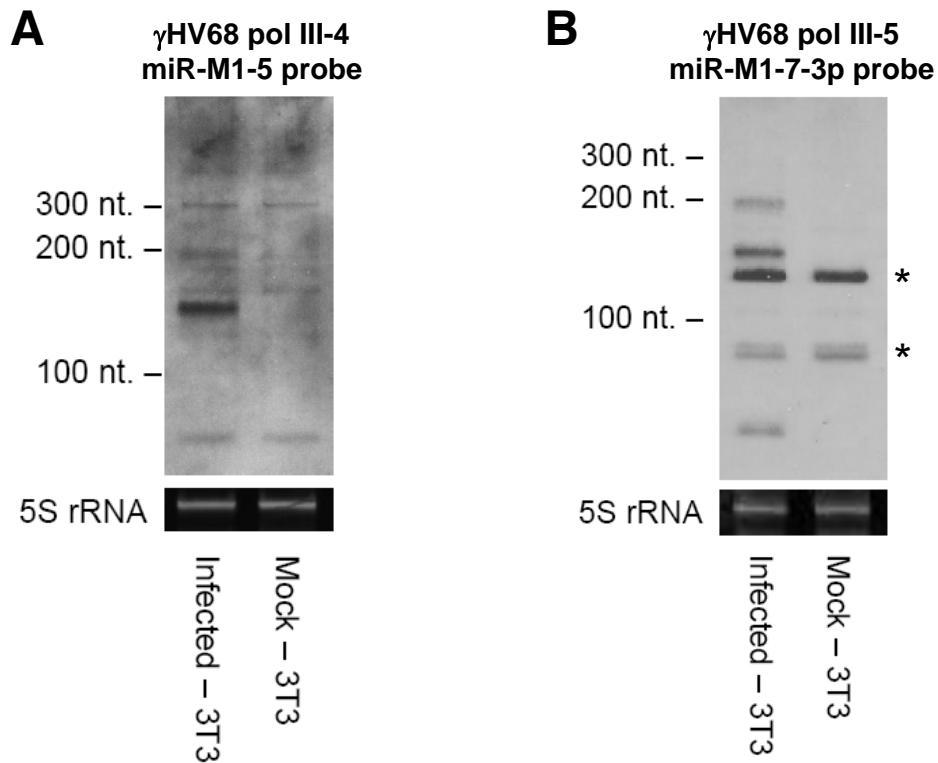

**Figure S4. Analysis of the pol III-4 and pol III-5 transcription units of γHV68**

(A) Northern blot of γHV68 pol III-4 from total RNA isolated from infected 3T3 cells collected at 24 hours post-infection, using a probe specific for the miR-M1-5 portion of the transcript. Ethidium bromide-stained 5S rRNA shown below serves as a loading control. The size of the predominant band (~135 nt) corresponds to the one predicted for a transcript terminated at  $T_4$  between miR-M1-5 and miR-M1-6. The fainter 200-nt band corresponds to a transcript generated by Pol III reading through  $T_4$  and terminating at the downstream located  $T_6$  (see Figure 6). (B) Northern blot of γHV68 pol III-5 from total RNA isolated from infected 3T3 cells collected at 36 hours post-infection, using a probe specific for the miR-M1-7-3p portion of the transcript. Ethidium bromide-stained 5S rRNA shown below serves as a loading control. Three clearly detectable transcripts are produced: one of about 200 nt in length, likely generated by termination at the most downstream located  $T_4$ ; one of about 135 nt, likely generated by termination at the non-canonical TTATT signal; and one of about 60 nt, likely corresponding to pre-miR-M1-7 (see Figure 6). Asterisks indicate non-specific transcripts detected by the probe in both infected and control samples.
